# Supplementary material for: Anthocephalus cadamba shaped FeNi encapsulated carbon nanostructures for metal–air batteries as a resilient bifunctional oxygen electrocatalyst
Source: Royal Society of Chemistry journal article supplement (doi:10.1039/c8ta05822a), 2018-01-01
Supplement: c8ta05822a1.pdf [file c8ta05822a1.pdf]

## Supporting Information

**Mimicking anthocephalus cadamba shaped FeNi encapsulated carbon nanostructures  
for metal-air batteries as resilient bifunctional oxygen electrocatalyst**

*Ravi Nandan,<sup>a</sup> Ajay Gautam<sup>a</sup> and Karuna Kar Nanda<sup>a,\*</sup>*

<sup>a</sup>Materials Research Centre, Indian institute of Science, Bangalore-560012, India.

Fax: +91-80-2360 7316; Ph: +91-80-2293 2996

\*E-mail: [nanda@iisc.ac.in](mailto:nanda@iisc.ac.in) (Prof. K. K. Nanda)

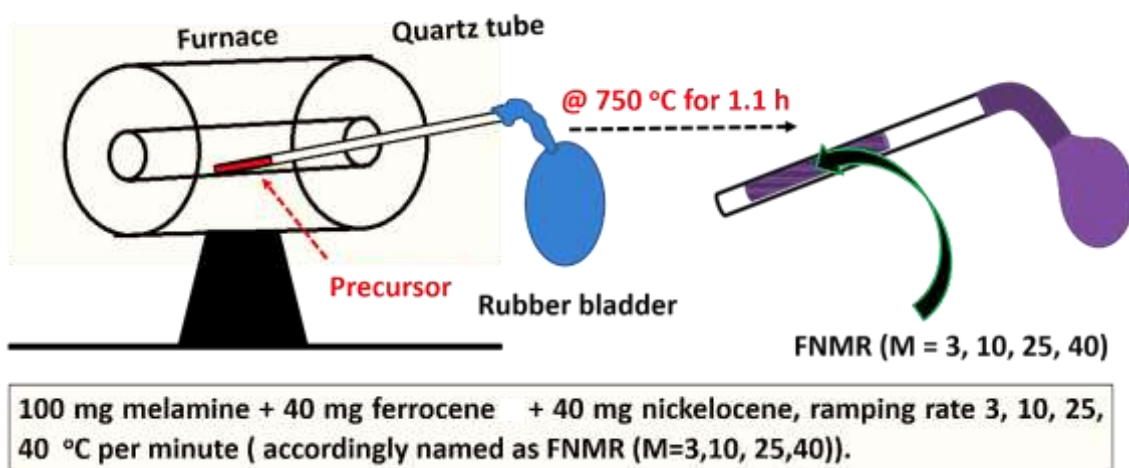

**Figure S1.** Schematic representation of FNMR (M= 3, 10, 25, 40) synthesis. The close end of the precursor loaded quartz tube was kept at the middle position of the furnace followed by pyrolysis at 750 °C for 1.1 h.

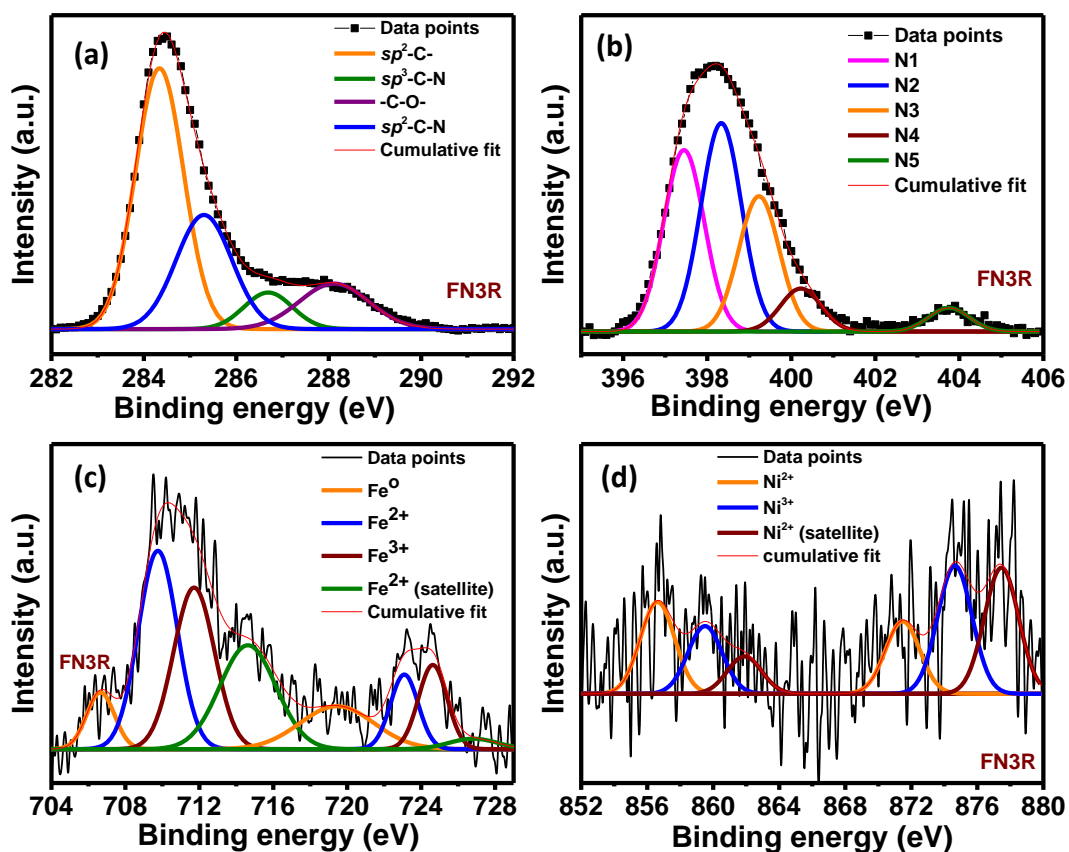

**Figure S2.** Deconvoluted HRXPS core spectra of FN3R for (a) C1s, (b) N1s, (c) Fe (2p) and (d) Ni2p, respectively.

**Figure S2a** shows the deconvoluted C1s core spectrum of FN3R comprises of peaks centred around 284.4, 285.3, 286.6 and 288.1 eV which can be assigned to to  $sp^2$ -C,  $sp^2$  C-N,  $sp^3$  C-N and carbon-oxygen functionalities, respectively.<sup>1-3</sup> Depending upon the nitrogen chemical environment and interactions with other elements, the deconvolution of N1s spectrum suggests the presence of pyridinic (N1~397.4), pyrrolic (N3~399.2 eV), quaternary (N4~400.2 eV) and some oxygenated nitrogen (N5~403.7 eV) functionalities, in addition to the metal-nitrogen coordinated functionalities M-N<sub>x</sub>C (M= Fe, Ni) with characteristic binding energy of  $398.6 \pm 0.3$  eV (N2).<sup>1-4</sup> The deconvolution of Fe2p core spectrum (Figure. S2c) suggests the presence of the peaks centred around 706.6, 709.7, 711.7 eV can be attributed to the Fe<sup>0</sup>, Fe<sup>2+</sup>, Fe<sup>3+</sup> 2p<sub>3/2</sub> state whereas peaks centred around 719.4, 723, 724.6 eV can be attributed to the Fe<sup>0</sup>, Fe<sup>2+</sup>, Fe<sup>3+</sup> 2p<sub>1/2</sub> states.<sup>1-8</sup> Besides, Fe<sup>2+</sup> satellite peaks at 714.6 eV (2p<sub>3/2</sub>) and 726.8 eV (2p<sub>1/2</sub>) has been

observed.<sup>6</sup> Similarly, the peaks centred around 856.6, 859.5 eV can be attributed to the Ni<sup>2+</sup>, Ni<sup>3+</sup> 2p<sub>3/2</sub> state whereas peaks centred around 871.4, 874.6 eV can be attributed to the Ni<sup>2+</sup>, Ni<sup>3+</sup> 2p<sub>1/2</sub> states.<sup>6-13</sup> In addition, Ni<sup>2+</sup> satellite peaks at 861.8 eV (2p<sub>3/2</sub>) and 877.4 eV (2p<sub>1/2</sub>) has been also observed.<sup>6</sup>

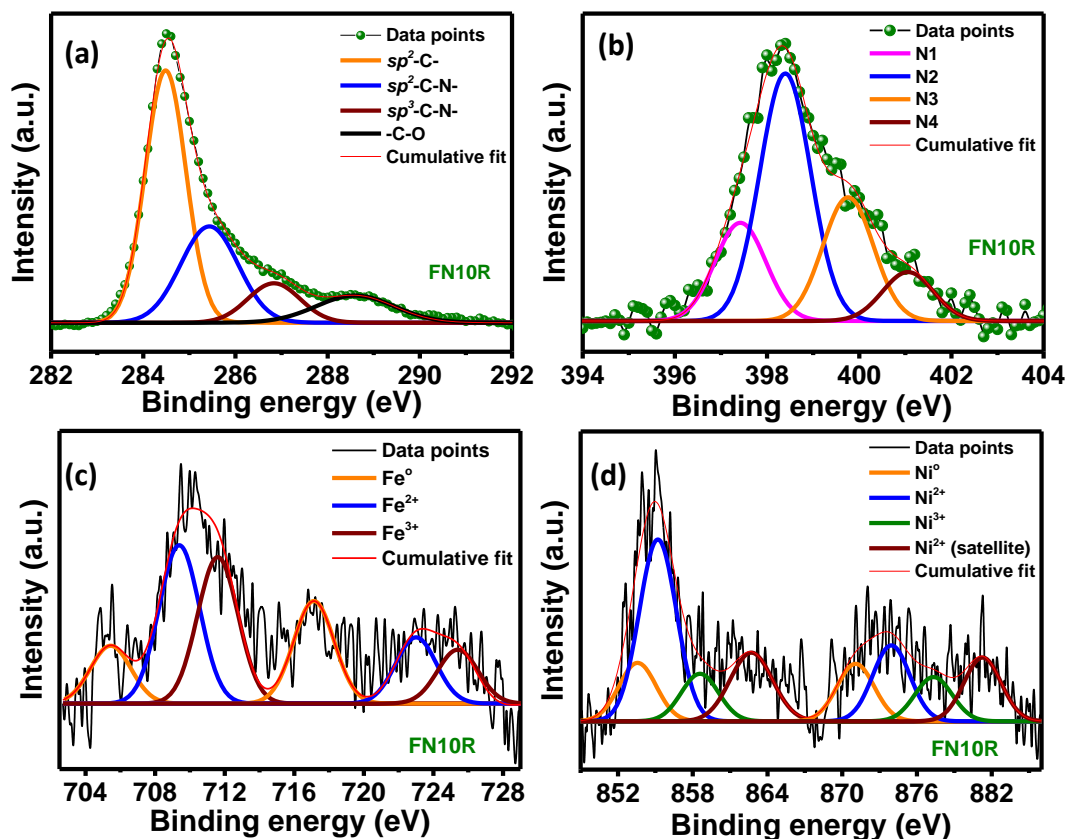

**Figure S3.** Deconvoluted HRXPS core spectra of FN10R for (a) C1s, (b) N1s, (c) Fe (2p) and (d) Ni2p, respectively.

**Figure S3a** shows the deconvoluted C1s core spectrum of FN10R comprises of peaks centred around 284.48, 285.4, 286.8 and 288.6 eV which can be assigned to to  $sp^2$ -C,  $sp^2$  C-N,  $sp^3$  C-N and carbon-oxygen functionalities, respectively.<sup>1-3</sup> Depending upon the nitrogen chemical environment and interactions with other elements, the deconvolution of N1s spectrum (Figure. S3b) suggests the presence of pyridinic (N1~397.4), pyrrolic (N3~399.7 eV), quaternary (N4~401 eV) functionalities, in addition to the metal-nitrogen coordinated functionalities M-

N<sub>x</sub>C (M= Fe, Ni) with characteristic binding energy of 398.6±0.3 eV (N2).<sup>1-4</sup> The deconvolution of Fe2p core spectrum (Figure S3c) suggests the presence of the peaks centred around 705.4, 709.3, 711.6 eV can be attributed to the Fe<sup>0</sup>, Fe<sup>2+</sup>, Fe<sup>3+</sup> 2p<sub>3/2</sub> state whereas peaks centred around 717.1, 723.2, 725.4 eV can be attributed to the Fe<sup>0</sup>, Fe<sup>2+</sup>, Fe<sup>3+</sup> 2p<sub>1/2</sub> states.<sup>1-8</sup> Similarly, the peaks centred around 853.5, 855.2, 858.5 eV can be attributed to the Ni<sup>0</sup>, Ni<sup>2+</sup>, Ni<sup>3+</sup> 2p<sub>3/2</sub> state whereas peaks centred around 871.2, 873.9, 877.3 eV can be attributed to the Ni<sup>0</sup>, Ni<sup>2+</sup>, Ni<sup>3+</sup> 2p<sub>1/2</sub> states.<sup>6-13</sup> In addition, Ni<sup>2+</sup> satellite peaks at 862.7 eV (2p<sub>3/2</sub>) and 88.2 eV (2p<sub>1/2</sub>) has been also observed.<sup>6</sup>

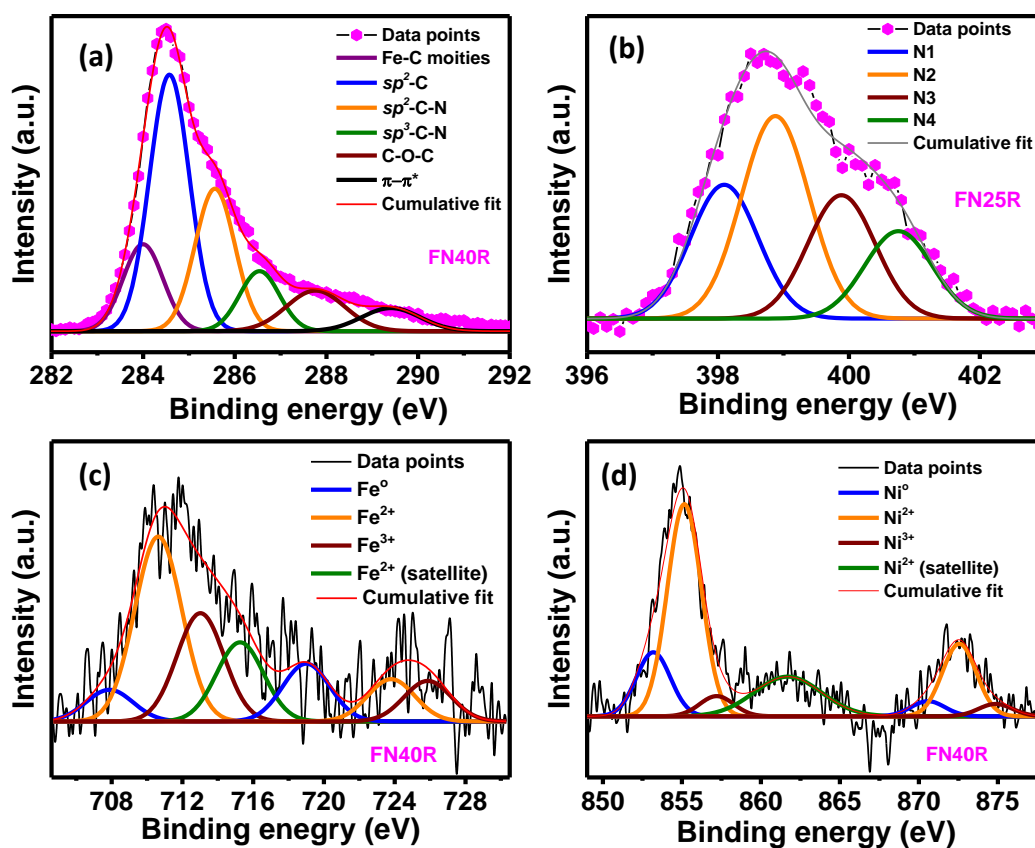

**Figure S4.** Deconvoluted HRXPS core spectra of FN40R for (a) C1s, (b) N1s, (c) Fe (2p) and (d) Ni2p, respectively.

**Figure S4a** shows the deconvoluted C1s core spectrum of FN40R comprises of peaks centred around 283.9, 284.5, 285.5, 286.8, 286.5, 287.7 and 289.4 eV which can be assigned to to *Fe*-

C, sp<sup>2</sup>-C, sp<sup>2</sup> C-N, sp<sup>3</sup> C-N, carbon-oxygen (C-O-C) functionalities and  $\pi$ - $\pi^*$  satellite peak, respectively.<sup>1-3</sup> Depending upon the nitrogen chemical environment and interactions with other elements, the deconvolution of N1s spectrum (Figure. S4b) suggests the presence of pyridinic (N1~398), pyrrolic (N3~399.8 eV) and quaternary (N4~400.7 eV) functionalities, in addition to the metal-nitrogen coordinated functionalities M-N<sub>x</sub>C (M= Fe, Ni) with characteristic binding energy of 398.6±0.3 eV (N2).<sup>1-4</sup> The deconvolution of Fe2p core spectrum (Figure. S4c) suggests the presence of the peaks centred around 707.8, 710.6, 713.1 eV can be attributed to the Fe<sup>0</sup>, Fe<sup>2+</sup>, Fe<sup>3+</sup> 2p<sub>3/2</sub> state whereas peaks centred around 719, 723.8, 725.8 eV can be attributed to the Fe<sup>0</sup>, Fe<sup>2+</sup>, Fe<sup>3+</sup> 2p<sub>1/2</sub> states.<sup>1-8</sup> Besides, a Fe<sup>2+</sup> satellite peak at 715.2 eV (2p<sub>3/2</sub>) has been observed.<sup>6</sup> Similarly, the peaks centred around 853.1, 855.1, 857.2 eV can be attributed to the Ni<sup>0</sup>, Ni<sup>2+</sup>, Ni<sup>3+</sup> 2p<sub>3/2</sub> state whereas peaks centred around 870.5, 872.5, 874.8 eV can be attributed to the Ni<sup>0</sup>, Ni<sup>2+</sup>, Ni<sup>3+</sup> 2p<sub>1/2</sub> states.<sup>6-13</sup> In addition, Ni<sup>2+</sup> satellite peak at 861.7 eV (2p<sub>3/2</sub>) has been also observed.<sup>6</sup>

**Table S1.** Elemental composition of FNMR (M=3, 10, 25, 40) evaluated from XPS spectra.

| Electrocatalyst | Carbon (at. %) | Nitrogen (at. %) | Iron (at. %) | Nickel (at. %) |
|-----------------|----------------|------------------|--------------|----------------|
| FN3R            | 90.9           | 8.1              | 0.8          | 0.2            |
| FN10R           | 89.6           | 8.4              | 0.9          | 1.1            |
| FN25R           | 84.6           | 10.8             | 3.9          | 0.7            |
| FN40R           | 90.3           | 8                | 0.8          | 0.9            |

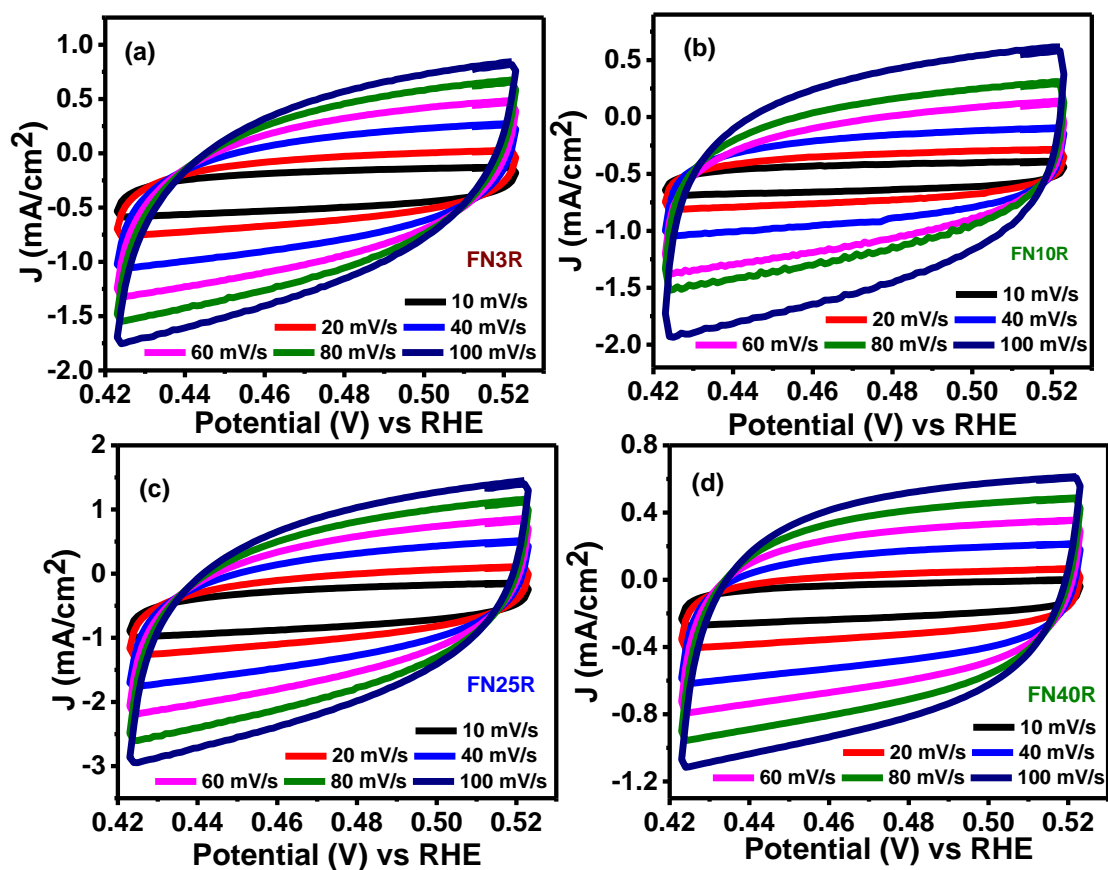

**Figure S5.** Cyclic voltammograms recorded in non-Faradic region for double layer capacitance calculation in 1 M NaOH nitrogen-purged aqueous solution at different scan rate (10-100 mV/s) for (a) FN3R, (b) FN10R, (c) FN25R and (d) FN40R, respectively.

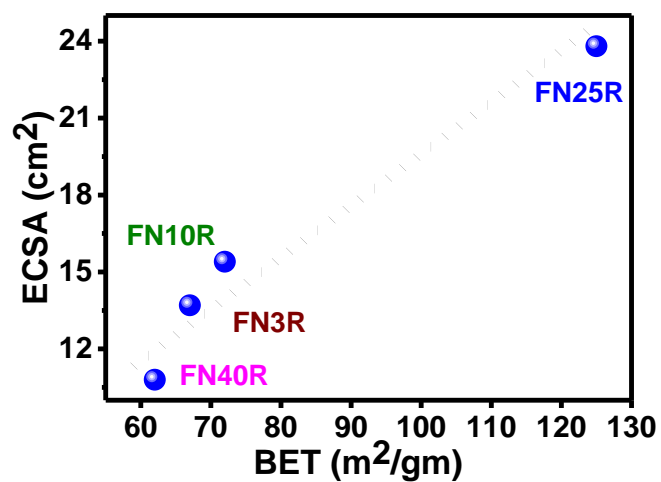

**Figure S6.** Correlation between BET specific surface area and ECSA. The BET specific surface area is in consistent with the ECSA of FNMR. The line is the guide for eye.

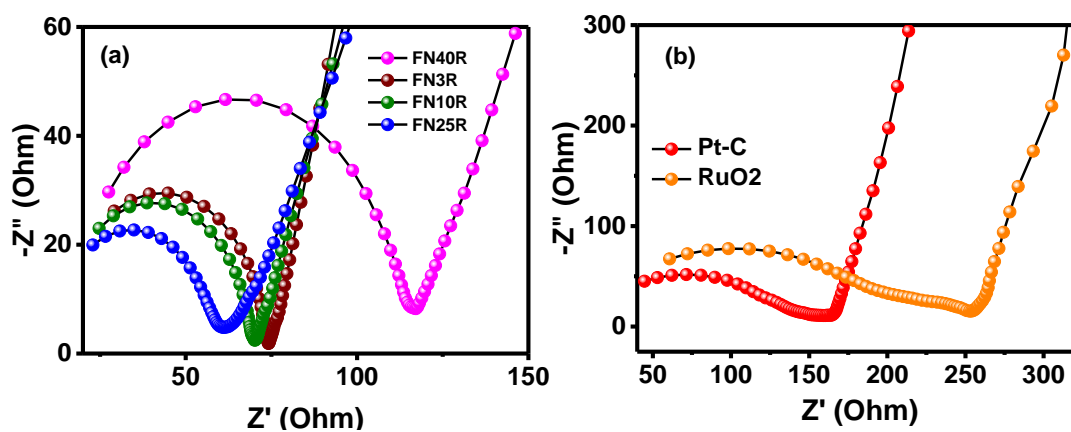

**Figure S7.** Nyquist plots on (a) FNMR ( $M=3, 10, 25, 40$ ) and on (b) Pt-C and RuO<sub>2</sub> in 1 M NaOH aqueous solution at 1.5 V vs RHE.



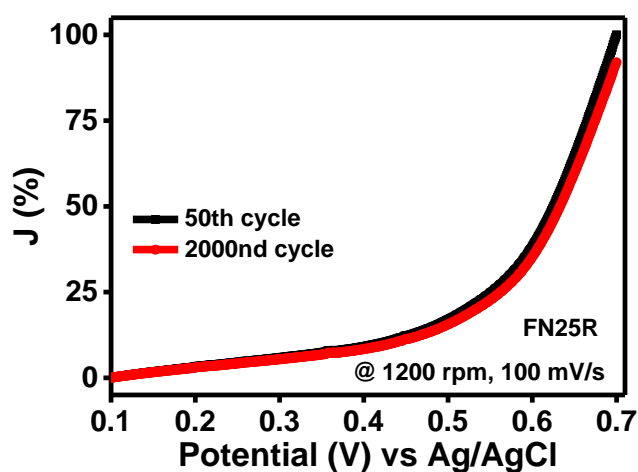

**Figure S8.** OER polarization curves (50th and 2000nd cycles) recorded on FN25R during accelerated stability test in alkaline (1 M NaOH) medium at rotation speed of 1200 rpm and 100 mV/s scan speed.

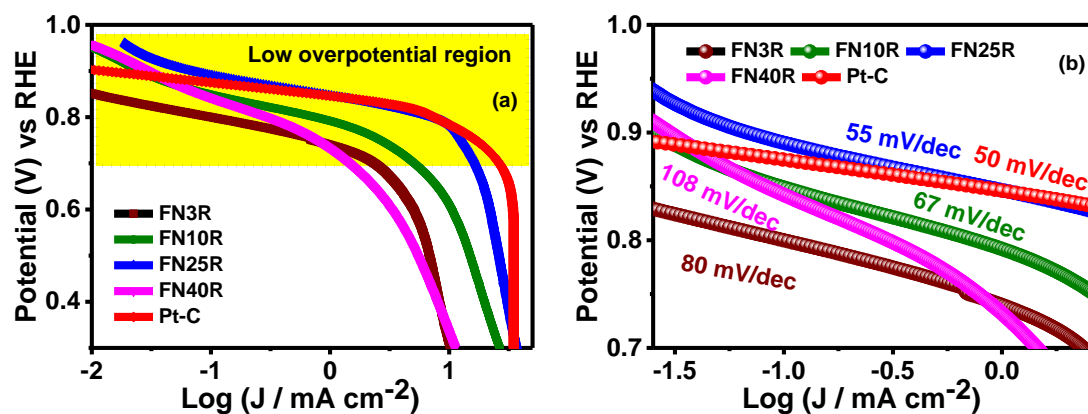

**Figure S9.** (a) Tafel slope evaluation on FNMR (M= 3, 10, 25, 40) deduced from LSV-ORR polarization curves ( from figure 5a) in low over potential region (figure b, magnified portion as marked in figure a).

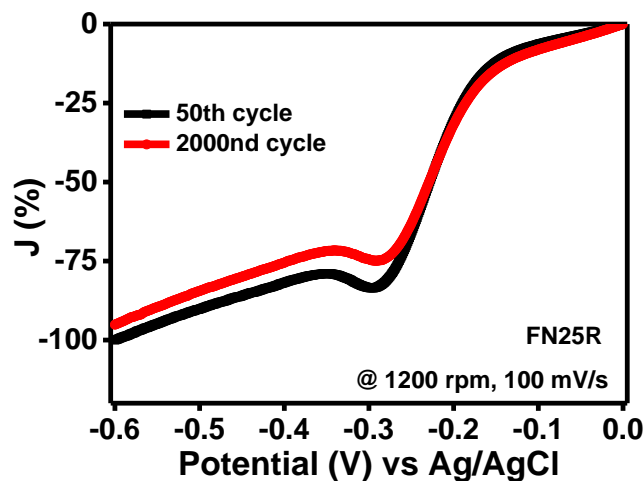

**Figure S10.** ORR polarization curves (50<sup>th</sup> and 2000<sup>nd</sup> cycles) recorded on FN25R during accelerated stability test in alkaline (0.1 M NaOH) medium at rotation speed of 1200 rpm and 100 mV/s scan speed.

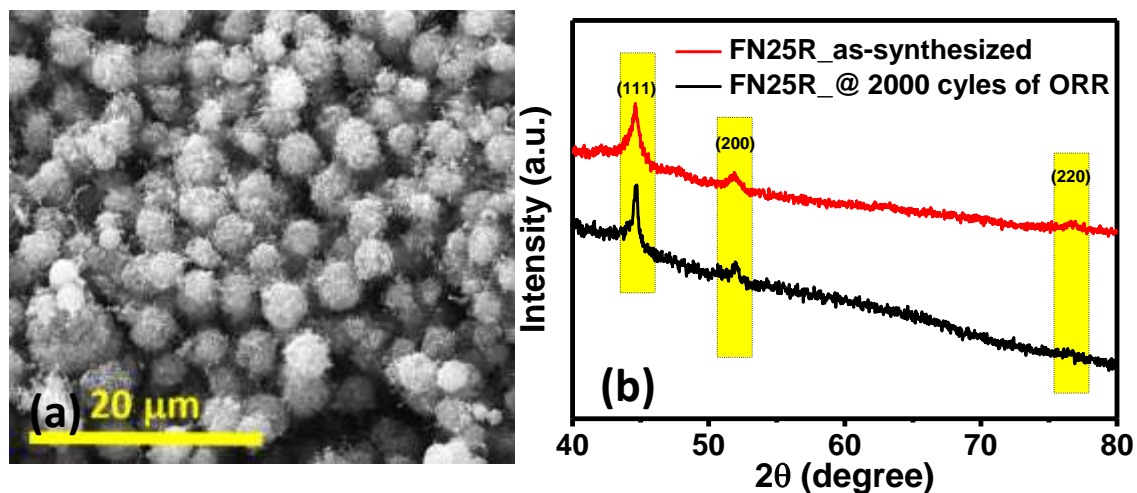

**Figure S11.** (a) SEM image and (b) XRD pattern recorded on FN25R after ORR-AST study suggest the retaining of structure. The XRD patterns suggests that FeNi nanoparticles present in FN25R preserved the face-centred cubic phase as evident by characteristic reflections arising from (111), (200) and (220) planes of FeNi nanoparticles.

**Table S2.** OER activity summary for various carbon-based electrocatalysts in alkaline medium.

| Electrocatalyst                                                     | Electrocatalyst loading      | E <sub>on-set</sub> (mV)<br>Vs Ag/AgCl | E <sub>J=10</sub> (mV)<br>Vs Ag/AgCl | Reference                                                       |
|---------------------------------------------------------------------|------------------------------|----------------------------------------|--------------------------------------|-----------------------------------------------------------------|
| CoFe <sub>2</sub> O <sub>4</sub> /rGO                               | 1.006 mg/cm <sup>2</sup>     | 540                                    | 700                                  | <i>Journal of Power Sources</i> 250 (2014) 196-203              |
| FeCo <sub>2</sub> O <sub>4</sub> -HrGOS                             | 1.006 mg/cm <sup>2</sup>     | 570                                    | 750                                  | <i>Carbon</i> 92 (2015) 74–83                                   |
| CoFe <sub>2</sub> O <sub>4</sub> /CNTs                              | 1.006 mg/cm <sup>2</sup>     | 600                                    | 700                                  | <i>Electrochimica Acta</i> 177 (2015) 65–72                     |
| MWCNT@S–N–C                                                         | 0.200 mg/cm <sup>2</sup>     | 600                                    | 700                                  | <i>New J. Chem.</i> , 2015, 39, 6289–6296                       |
| S,N,Fe-porous carbon                                                | 0.100 mg/cm <sup>2</sup>     | ----                                   | 650                                  | <i>Green Chem.</i> , 2016, <b>18</b> , 4004-4011                |
| N-doped Fe-Fe <sub>3</sub> C@graphitic layer                        | 0.710 mg/cm <sup>2</sup>     | 600                                    | 778                                  | <i>Green Chemistry</i> 18 (2016), 427-432                       |
| Nitrogen-doped Fe/Fe <sub>3</sub> C@graphitic layer/carbon nanotube | 0.103 mg/cm <sup>2</sup>     | 500                                    | 850                                  | <i>Chem. Commun.</i> , 2015, <b>51</b> , 2710-2713              |
| NiCo <sub>2</sub> S <sub>4</sub> @N/SrGO                            | 0.283 mg/cm <sup>2</sup>     | 600                                    | 720                                  | <i>ACS Appl. Mater. Interfaces</i> , 2013, 5 (11), pp 5002–5008 |
| Fe <sub>3</sub> C-NCNTs co-embedded boron doped carbon              | 0.75 mg/cm <sup>2</sup>      | 422                                    | 562                                  | <i>J. Mater. Chem. A</i> , 2017, <b>5</b> , 16843-16853         |
| Fe <sub>3</sub> C-FeNx enriched carbon sphere                       | 1 mg/cm <sup>2</sup>         | 380                                    | 550                                  | <i>J. Mater. Chem. A</i> , 2018, <b>6</b> , 8537                |
| FN10R                                                               | 0.4 mg/cm <sup>2</sup>       | 465                                    | 545                                  | <i>Present study</i>                                            |
| <b>FN25R</b>                                                        | <b>0.4 mg/cm<sup>2</sup></b> | <b>375</b>                             | <b>495</b>                           | <b><i>Present study</i></b>                                     |

**Table S3.** ORR activity summary for various carbon-based electrocatalysts in alkaline medium.

| Electrocatalyst                                        | Electrocatalyst loading      | E <sub>on</sub> -set (mV) Vs (Ag/AgCl) | E <sub>1/2</sub> (Vs Ag/AgCl) | Reference                                          |
|--------------------------------------------------------|------------------------------|----------------------------------------|-------------------------------|----------------------------------------------------|
| MWCNT@S-N-C                                            | 0.1 mg/cm <sup>2</sup>       | -200                                   | ~-350                         | <i>New J. Chem.</i> , 2015, 39, 6289--6296         |
| CoFe <sub>2</sub> O <sub>4</sub> /CNTs                 | 1.006 mg/cm <sup>2</sup>     | -124                                   | ~ -300                        | <i>Electrochimica Acta</i> 177 (2015) 65–72        |
| CoFe <sub>2</sub> O <sub>4</sub> /rGO                  | 1.006 mg/cm <sup>2</sup>     | -136                                   | ~ -260                        | <i>Journal of Power Sources</i> 250 (2014) 196e203 |
| Co-N-GN                                                | 0.1 mg/cm <sup>2</sup>       | -98                                    | -162                          | <i>J. Mater. Chem. A</i> , 2013, 1, 3593-3599      |
| N,P,S-rGO/ <i>E. coli</i>                              | 0.510 mg/cm <sup>2</sup>     | -90                                    | ~ -220                        | <i>J. Mater. Chem. A</i> 2015,3, 12873-12879       |
| FeCo <sub>2</sub> O <sub>4</sub> -HrGOS                | 1.006 mg/cm <sup>2</sup>     | -90                                    | ~ -200                        | <i>Carbon</i> 92 (2015) 74-83                      |
| N-graphene/CNT hybrids                                 | 0.430 mg/cm <sup>2</sup>     | -80                                    | ~ -200                        | <i>Angew. Chem. Int. Ed.</i> 2014, 53, 6496 - 6500 |
| N-CNTs                                                 | 0.306 mg/cm <sup>2</sup>     | -60                                    | -220                          | <i>Carbon</i> 50 (2012) 2620-2627                  |
| N,S-Graphene                                           | 0.43 mg/cm <sup>2</sup>      | -60                                    | -300                          | <i>Angew. Chem., Int. Ed.</i> , 2012, 51, 11496    |
| Fe <sub>3</sub> C-NCNTs co-embedded boron doped carbon | 0.75 mg/cm <sup>2</sup>      | -30                                    | -225                          | <i>J. Mater. Chem. A</i> , 2017, 5, 16843-16853    |
| FN10R                                                  | 0.4 mg/cm <sup>2</sup>       | -65                                    | -265                          | <i>Present study</i>                               |
| <b>FN25R</b>                                           | <b>0.4 mg/cm<sup>2</sup></b> | <b>-27</b>                             | <b>-154</b>                   | <b><i>Present study</i></b>                        |

**Table S4.** Overall oxygen electroactivity ( $\Delta E$ ) summary for various carbon-based electrocatalysts in alkaline medium.

| Catalyst                                                  | Overall oxygen electrochemistry<br>$\Delta E (E_{j=10(\text{OER})} - E_{1/2(\text{ORR})})(\text{V})$ | Reference                                                   |
|-----------------------------------------------------------|------------------------------------------------------------------------------------------------------|-------------------------------------------------------------|
| S-N-C@MWCNTs                                              | ~1.25                                                                                                | <i>New J. Chem.</i> 2015, 39, 6289.                         |
| NCNF-1000                                                 | ~1.02                                                                                                | <i>Adv. Mater.</i> 2016, 28, 3000–3006.                     |
| Fe/Fe <sub>3</sub> C@NGL-NCNT                             | ~1                                                                                                   | <i>Chem. Commun.</i> 2015, 51, 2710.                        |
| N-Graphene/CNTs                                           | ~1.00                                                                                                | <i>Small</i> , 2014, 10, 2251.                              |
| B-MWCNTs                                                  | ~1.00                                                                                                | <i>Electrochimica Acta</i> 2014,143, 291.                   |
| CoFe <sub>2</sub> O <sub>4</sub> /rGO                     | ~0.98                                                                                                | <i>J. Power Sources</i> 2014, 250, 196.                     |
| CoFe <sub>2</sub> O <sub>4</sub> /N-P-biocarbon           | ~0.98                                                                                                | <i>J. Mater. Chem. A</i> 2014,2,18012.                      |
| N,P-Carbon paper                                          | ~ 0.96                                                                                               | <i>Angew. Chem. Int. Ed.</i> 2015, 54, 4646.                |
| P-doped g-C <sub>3</sub> N <sub>4</sub> /CF               | ~0.96                                                                                                | <i>Angew. Chem. Int. Ed.</i> 2015, 54, 4646–4650.           |
| Fe/Fe <sub>3</sub> C@ N-graphitic layer                   | ~ 0.97                                                                                               | <i>Green Chemistry</i> 2015, DOI: 10.1039/c5gc01405k        |
| Pt@C                                                      | ~0.94                                                                                                | <i>Angew. Chem. Int. Ed.</i> 2014, 53, 8508.                |
| Mn <sub>x</sub> O <sub>y</sub> /N-Carbon                  | ~0.93                                                                                                | <i>Angew. Chem. Int. Ed.</i> 2014, 53, 8508.                |
| Ir@C                                                      | ~0.92                                                                                                | <i>J. Am. Chem. Soc.</i> 2010,132, 3612.                    |
| NiCo <sub>2</sub> O <sub>4</sub> /Graphene                | ~0.915                                                                                               | <i>J. Mater. Chem. A</i> 2013,1,4754.                       |
| N, S, O carbon nanosheet                                  | ~0.88                                                                                                | <i>Nano Energy</i> 19 (2016) 373–381                        |
| Fe@N-C                                                    | ~0.88                                                                                                | <i>Nano Energy</i> 2015, 13, 387–396.                       |
| NiO/CoN PINWs                                             | ~0.8                                                                                                 | <i>ACS Nano</i> , 2017, 11 (2), pp 2275–2283                |
| Fe/N/C@BMZIF                                              | ~0.79                                                                                                | <i>ACS Appl. Mater. Interfaces</i> , 2017, 9 (6), 5213–5221 |
| Fe <sub>3</sub> C-NCNTs co-embedded boron doped carbon    | ~0.788                                                                                               | <i>J. Mater. Chem. A</i> , 2017, 5, 16843-16853             |
| Ni <sub>3</sub> Fe/N-C sheets                             | 0.84                                                                                                 | <i>Adv. Energy Mater.</i> 2017, 7, 1601172                  |
| Fe <sub>3</sub> C-FeN <sub>x</sub> enriched carbon sphere | ~0.758                                                                                               | <i>J. Mater. Chem. A</i> , 2018, 6, 8537                    |
| FN25R                                                     | ~0.71                                                                                                | <i>Present study</i>                                        |

## References

- [1] R. Nandan, A. Gautam and K. K. Nanda, *J. Mater. Chem. A*, 2017, **5**, 20252–20262;
- [2] R. Nandan, A. Gautam, S. Tripathi and K. K. Nanda, *J. Mater. Chem. A*, 2018, 8537–8548.
- [3] R. Nandan and K. K. Nanda, *J. Mater. Chem. A*, 2017, **5**, 16843–16853
- [4] M. Wang, T. Qian, J. Zhou and C. Yan, *ACS Appl. Mater. Interfaces*, 2017, **9**, 5213–5221.
- [5] J.-S. Li, S.-L. Li, Y.-J. Tang, M. Han, Z.-H. Dai, J.-C. Bao and Y.-Q. Lan, *Chem. Commun.*, 2015, **51**, 2710–2713.
- [6] X. Wang, X. Liu, C.-J. Tong, X. Yuan, W. Dong, T. Lin, L.-M. Liu and F. Huang, *J. Mater. Chem. A*, 2016, **4**, 7762–7771.
- [7] L. Du, L. Luo, Z. Feng, M. Engelhard, X. Xie, B. Han, J. Sun, J. Zhang, G. Yin, C. Wang, Y. Wang and Y. Shao, *Nano Energy*, 2017, **39**, 245–252
- [8] F. W. Zhengping Zhang, Yeshen Qin, Meiling Dou, Jing Ji and State, *Nano Energy*, 2016, **30**, 426–433.
- [9] C. Xuan, J. Wang, W. Xia, J. Zhu, Z. Peng, K. Xia, W. Xiao, H. L. Xin and D. Wang, *J. Mater. Chem. A*, 2018, 7062–7069.
- [10] B. K. Kang, M. H. Woo, J. Lee, Y. H. Song, Z. Wang, Y. Guo, Y. Yamauchi, J. H. Kim, B. Lim and D. H. Yoon, *J. Mater. Chem. A Mater. energy Sustain.*, 2017, **5**, 4320–4324.
- [11] H. Qiao, J. Yong, X. Dai, X. Zhang, Y. Ma, M. Liu, X. Luan, J. Cai, Y. Yang, H. Zhao and X. Huang, *J. Mater. Chem. A*, 2017, **5**, 21320–21327.
- [12] X. Long, Z. Ma, H. Yu, X. Gao, X. Pan, X. Chen, S. Yang and Z. Yi, *J. Mater. Chem. A*, 2016, **4**, 14939–14943.
- [13] U. Y. Qazi, C. Z. Yuan, N. Ullah, Y. F. Jiang, M. Imran, A. Zeb, S. J. Zhao, R. Javaid and A. W. Xu, *ACS Appl. Mater. Interfaces*, 2017, **9**, 28627–28634.
